# Supplementary material
Source: publisher site journal article supplement (https://www.dovepress.com/article/444999)
Supplement: Supplementary file 1 [file get_supplementary_file.php]

**Supplementary Material 1.** Patient Satisfaction Survey

|  | **Disagree very much** | **Disagree** | **Disagree a little** | **Agree a little** | **Agree** | **Agree very much** |
| --- | --- | --- | --- | --- | --- | --- |
| I hurt during surgery | □6 | □5 | □4 | □3 | □2 | □1 |
| I felt good during surgery | □1 | □2 | □3 | □4 | □5 | □6 |
| I felt pain during surgery | □6 | □5 | □4 | □3 | □2 | □1 |
| I was satisfied with the anesthesia  care during surgery | □1 | □2 | □3 | □4 | □5 | □6 |
| I itched during surgery | □6 | □5 | □4 | □3 | □2 | □1 |
| I felt relaxed during surgery | □1 | □2 | □3 | □4 | □5 | □6 |
| I felt safe during surgery | □1 | □2 | □3 | □4 | □5 | □6 |
| I threw up after surgery | □6 | □5 | □4 | □3 | □2 | □1 |
| I felt like throwing up after surgery | □6 | □5 | □4 | □3 | □2 | □1 |
| I would have the same anesthetic  again | □1 | □2 | □3 | □4 | □5 | □6 |
| I was too hot or cold during surgery | □6 | □5 | □4 | □3 | □2 | □1 |
| My pain level was as expected and  well-controlled during the surgery | □6 | □5 | □4 | □3 | □2 | □1 |
